# Supplementary material for: Improved thermal and oxidation stability of bis(triethoxysilyl)ethane (BTESE)-derived membranes, and their gas-permeation properties
Source: Royal Society of Chemistry journal article supplement (doi:10.1039/c8ta07572g), 2018-01-01
Supplement: c8ta07572g1.pdf [file c8ta07572g1.pdf]

## Supplementary Information

Improved thermal and oxidation stability of bis(triethoxysilyl)ethane (BTESE)-derived membranes and their gas permeation properties

Xin Yu, Hiroki Nagasawa, Masakoto Kanezashi and Toshinori Tsuru

----- Supplementary Information-1 (SI-1) -----

The time course of TG weight with firing temperature was studied and is shown in Figure SI 1. BTESE powders were fired from room temperature to 250 °C and kept for 1 h, then the temperature was increased to 400 °C. The TG weight was drastically decreased to around 200 °C due to the decomposition of  $\text{NH}_4\text{Cl}$  [X. Yu et al J. Membr. Sci., 511 (2016) 219-227], and then even BTESE powders calcinated at 250 °C remained stable for nearly 1 h, which confirmed the decomposition of  $\text{NH}_4\text{Cl}$  was completed at 250 °C.

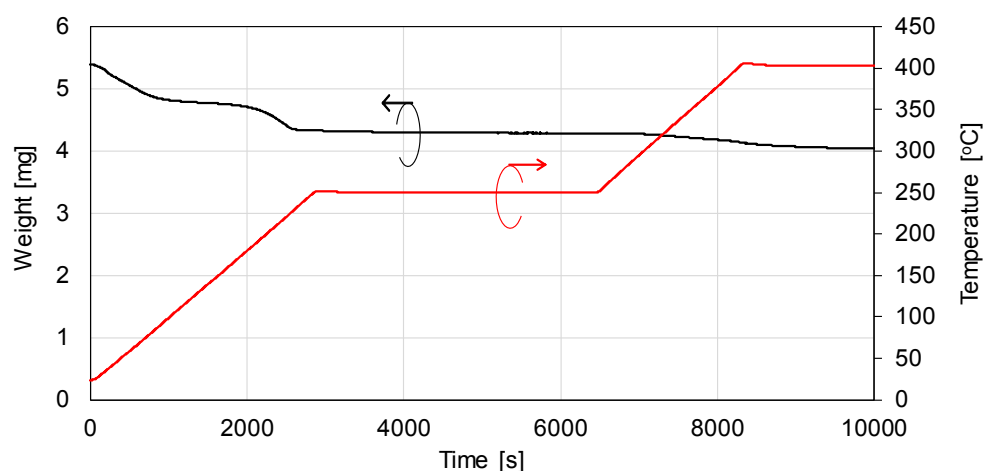

Figure SI-1. A time course of TG weight for BTESE-derived powders ( $\text{H}_2\text{O}$  ratio of 240,  $\text{H}^+$  ratio of 0.01) fired in  $\text{N}_2$  from room temperature to 400 °C with a ramping rate of 5 °C/min. Powders were kept at 250 °C for 1 h.

Figure SI2 shows the values for gas permeance of the intermediate layer, the top layer, and the total layers (total membrane) of a BTESE-derived membrane fired at 550 °C, which was used to calculate the gas-permeation resistance, as summarized in Figure SI3.

Many studies have applied resistance in a series model to explain the transport properties of membranes (Nagasawa et al., *J. Membr. Sci.*, 498 (2016) 336–344), and the resistance,  $R_i$ , is

$$R_i = \frac{1}{P_i}$$

defined as:  $R_i = \frac{1}{P_i}$ , where  $P_i$  is the permeance. The total permeation resistance across the membrane,  $R$ , can be given as follows,  $R = R_1 + R_2$ , where  $R_1$ ,  $R_2$  are the permeation resistance of the  $\text{SiO}_2\text{-ZrO}_2$  layer (including supports) and the BTESE-derived top layer.

The resistances of various gases permeating the intermediate layer and the total layers (total membrane) were calculated and appear in Figure R2.  $\text{H}_2$  has a small diameter, and its resistance was  $1.6 \times 10^5$ ,  $5.1 \times 10^5$  and  $6.7 \times 10^5$  ( $\text{m}^2 \text{ s Pa}$ )/mol for the  $\text{SiO}_2\text{-ZrO}_2$  layer ( $R_1$ ), the top layer ( $R_2$ ), and the total membrane ( $R$ ), respectively, which indicated that the top layer ( $R_2$ ) dominated 76% of the total permeation resistance ( $R$ ). For gases with large diameters, such as  $\text{CH}_4$  and  $\text{CF}_4$ , the percentages were 99.7% and 99.998%, respectively. As shown in Figure R1, the permeance of the top layer ( $1/R_2$ ) was almost the same as the total separation membrane. This trend was the same for all membranes fired at 300, 550 and 700 °C.

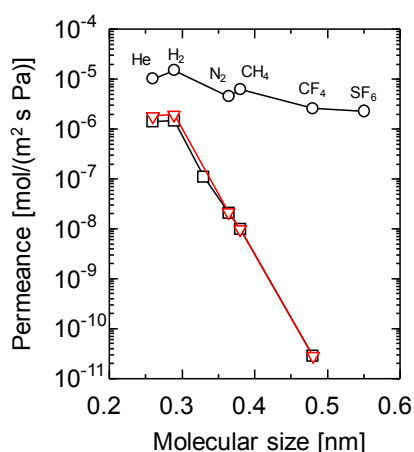

Figure SI 2. The relationship between gas permeance and kinetic diameter at 300 °C for a BTESE-derived membrane fired at 550 °C. The circles, squares and triangles are the  $\text{SiO}_2\text{-ZrO}_2$  layer, top layer and total membrane, respectively.

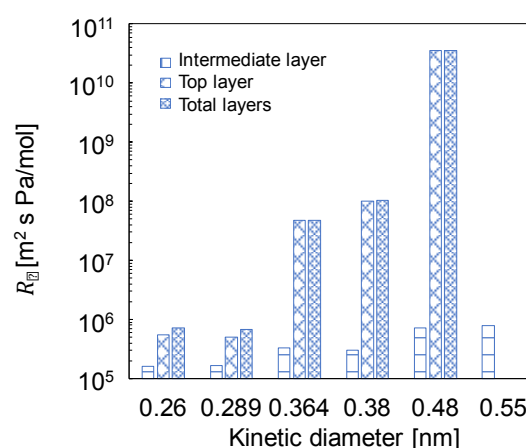

Figure SI 3. The relationship between  $R_i$  and kinetic diameter at 300 °C for the intermediate layer, top layer and total membrane.

The morphology of BTESE membrane was studied by examining cross-sectional SEM images and shown in Figure R4. The samples (a) and (b) were BTESE-derived membranes fired at 300 and 700 °C, respectively. The particle layer was uniformly distributed with Al<sub>2</sub>O<sub>3</sub> particles (0.2 μm), which could be clearly observed in both membranes. However, the membrane morphology showed no change even when the firing temperatures were increased. Regarding the thickness of the separation top layer, as we reported many times, the intermediate and separation layers were too thin to distinguish the thickness differences (X Yu et al., Journal of Membrane Science 511 (2016) 219–227).

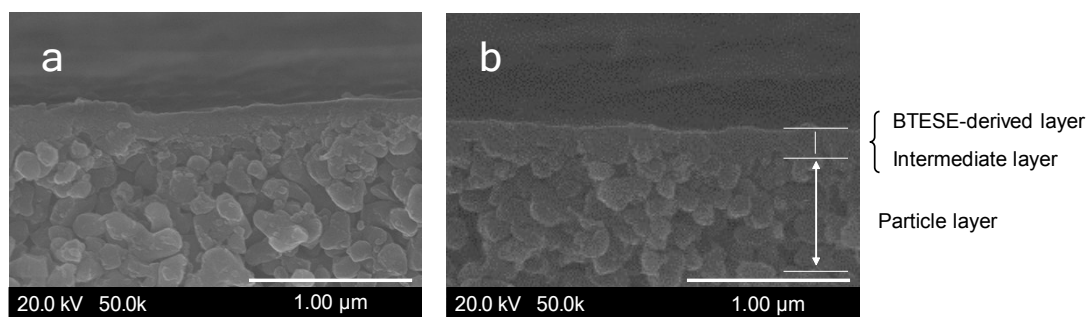

Figure SI4. The cross section of BTESE-derived membranes prepared at 300 (a) and 700 °C

----- Supplementary Information-3 (SI-3) -----

Figure SI5 shows a schematic illustration of the BTESE-derived organosilica membranes calcined at 300, 550, and 700 °C. A proposed structure of silica after gelation shows the presence of three pore domains: small, intermediate, and larger pore sizes that are referred to as  $D_{\text{small}}$ ,  $D_{\text{int}}$ , and  $D_{\text{large}}$ , as detected by PALS (Mikel C. Duke et al., *Adv. Funct. Mater.* 2008, 18, 3818–3826), or bimodal structures such as internal pores and unconnected pores as reported by Qi et al. (*J. Mater. Chem. A*, 2017, vol. 5, 24657-24666). Gas molecules with small-sized diameters such as He and H<sub>2</sub> can permeate connected pores, neck pores (or  $D_{\text{small}}$ ), and unconnected pores (or  $D_{\text{larger}}$ ), while gas molecules with large diameters such as N<sub>2</sub>, CH<sub>4</sub>, CF<sub>4</sub> and SF<sub>6</sub> can only permeate the unconnected pores. In addition, they concluded that both connected and unconnected pores were shrunken at high temperatures.

In this manuscript, BTESE-derived membranes were fired at 300, 550, and 700 °C, as shown in Figure SI5. N<sub>2</sub> can access the blue parts and the sizes of network pores and unconnected pores (larger pores) were decreased with higher firing temperatures. All the membranes showed H<sub>2</sub>/CH<sub>4</sub> ratios higher than 60 since most of the pores were formed by networks that N<sub>2</sub> and CH<sub>4</sub> could not permeate.

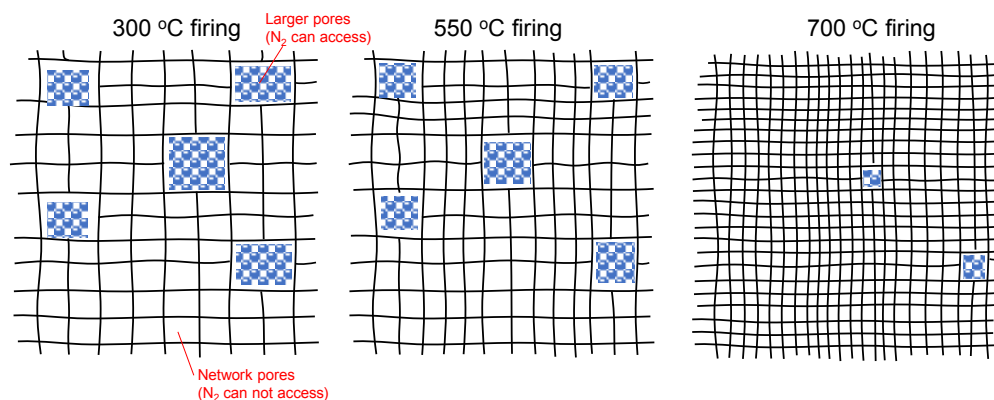

Figure SI5. Schematic illustration of the BTESE-derived organosilica membranes calcined at 300, 550, and 700 °C.

----- Supplementary Information-4 (SI-4) -----

Table SI-1: The H<sub>2</sub> permeances and H<sub>2</sub>/CH<sub>4</sub> selectivities for Figure 7.

|              | H <sub>2</sub> permeance<br>mol/(m <sup>2</sup> s Pa) | H <sub>2</sub> /CH <sub>4</sub> selectivity [-] | Ref.      |
|--------------|-------------------------------------------------------|-------------------------------------------------|-----------|
| BTESE 300 °C | 1.5E-06                                               | 32                                              |           |
| BTESE 300 °C | 1.0E-06                                               | 15                                              |           |
| BTESE 300 °C | 9.0E-07                                               | 62                                              |           |
| BTESE 300 °C | 7.5E-07                                               | 120                                             |           |
| BTESE 550 °C | 1.6E-06                                               | 93                                              |           |
| BTESE 550 °C | 6.1E-07                                               | 390                                             | this work |
| BTESE 550 °C | 3.5E-07                                               | 89                                              |           |
| BTESE 550 °C | 1.5E-06                                               | 152                                             |           |
| BTESE 550 °C | 6.8E-07                                               | 80                                              |           |
| BTESE 700 °C | 6.7E-07                                               | 507                                             |           |
| BTESE 700 °C | 7.2E-07                                               | 920                                             |           |
| BTESE 700 °C | 5.4E-07                                               | 287                                             |           |
| ZIF-7        | 8.0E-08                                               | 6                                               | 48        |
| ZIF-7        | 4.0E-07                                               | 10                                              | 49        |
| ZIF-7        | 4.6E-08                                               | 15                                              | 47        |
| ZIF-8        | 6.0E-08                                               | 13                                              | 49        |
| ZIF-22       | 1.9E-07                                               | 5                                               | 49        |
| ZIF-90       | 2.1E-07                                               | 19                                              | 49        |
| ZIF-95       | 2.0E-06                                               | 11                                              | 49        |
| ZIF-8        | 2.5E-07                                               | 23                                              | 50        |
| Na-A-zeolite | 6.9E-08                                               | 1200                                            | 45        |
|              | 1.7E-08                                               | 83                                              |           |
| Zeolite-T    | 9.6E-09                                               | 48                                              | 46        |
|              | 9.3E-09                                               | 47                                              |           |
|              | 9.6E-09                                               | 48                                              |           |
|              | 5.0E-07                                               | 4000                                            | 9         |
|              | 3.0E-07                                               | 1000                                            | 8         |
|              | 4.0E-08                                               | 160                                             | 8         |
| Silica       | 1.0E-08                                               | 221                                             | 42        |
|              | 1.0E-08                                               | 162                                             | 42        |
|              | 4.7E-07                                               | 350                                             | 43        |
|              | 5.1E-07                                               | 400                                             | 43        |
|              | 5.2E-08                                               | 60                                              | 44        |
|              | 6.8E-08                                               | 350                                             | 44        |
